# Supplementary material for: miRTarBase 2020: updates to the experimentally validated microRNA–target interaction database
Source: PubMed Central journal article supplement — Nucleic Acids Res. 2019 Oct 24;48(D1):D148–54. doi: 10.1093/nar/gkz896 (PMC7145596; doi:10.1093/nar/gkz896), 2019-10-24
Supplement: gkz896_supplemental_file.pdf [file gkz896_supplemental_file.pdf]

## SUPPLEMENTARY DATA

### The Application of miRTarBase

Prominent examples of miRTarBase used in recent papers include the following. The study of Hyun Jung Park suggested the major role of 3'untranslated region shortening in repressing tumor-suppressor genes *in trans* by disrupting ceRNA crosstalk (1). Dietrich et al. observed that KRAS is dysregulated in hepatocellular carcinoma due to the loss of tumor-suppressor miRNA-622, thereby promoting tumor progression and sorafenib sensitivity and resistance (2). Radovich et al. used multi-platform analyses of thymic epithelial tumors to discover the high prevalence of GTF2I mutations, which might provide substantial clinical implications for research on drug development for patients with thymic epithelial tumors in the future (3). Furthermore, a study published in *Science* worked on spatiotemporal transcriptomic divergence across human and macaque brain development and provided insights into the pathogenesis of neuropsychiatric disorders. Owing to the observation that many known biomarkers related with ischemic stroke are not disease-specific (4), Ceren Eyiletten et al. performed bioinformatic analysis to find promising miRNAs for clinical application in ischemic stroke (5).

SUPPLEMENTARY FIGURE

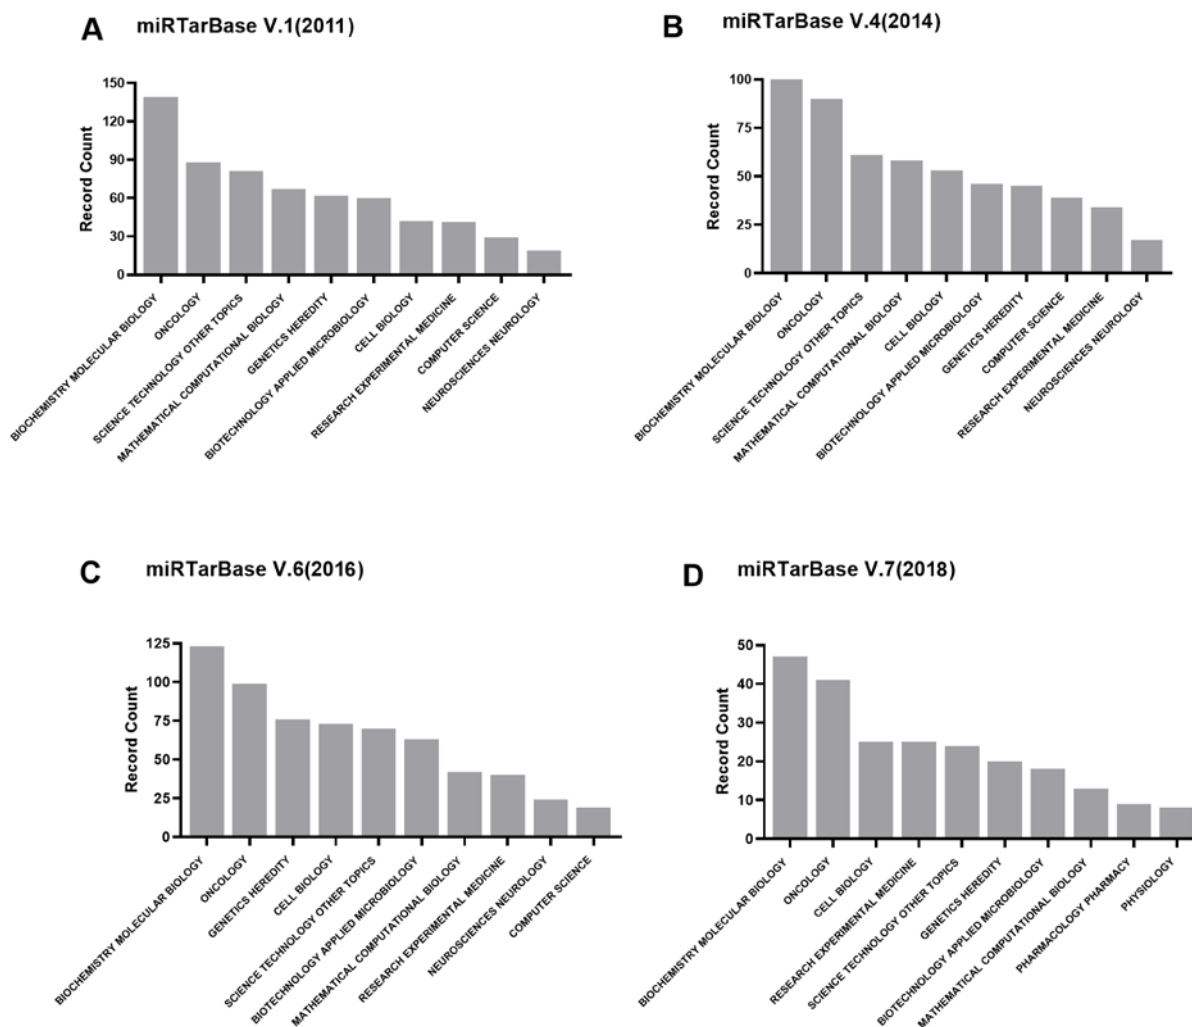

**Figure S1.** Research area distribution of citing papers from the Web of Science Core Collection based on all releases of miRTarBase.

**SUPPLEMENTARY TABLE**

**Table S1.** Update MTI datasets validated by high throughput HITS-CLIP or PAR-CLIP sequencing.

| Source                                                 | NGS method    | Species                                                               | RBP                | Accession | Samples    | Tissue/cell line | Treatment/Name          |             |               |
|--------------------------------------------------------|---------------|-----------------------------------------------------------------------|--------------------|-----------|------------|------------------|-------------------------|-------------|---------------|
| Benway, C.J., et al.<br>Am J Transplant<br>2018<br>(6) | PAR-CLIP      | Human                                                                 | AGO2               | GSE98670  | GSM2609180 | HK-2             | HK-2 AGO2-PAR-CLIP Veh1 |             |               |
|                                                        |               |                                                                       |                    |           | GSM2609181 |                  | HK-2 AGO2-PAR-CLIP Veh2 |             |               |
|                                                        |               |                                                                       |                    |           | GSM2609182 |                  | HK-2 AGO2-PAR-CLIP CsA1 |             |               |
|                                                        |               |                                                                       |                    |           | GSM2609183 |                  | HK-2 AGO2-PAR-CLIP CsA2 |             |               |
| Bottini, S., et al.<br>Nat Commun 2017<br>(7)          | HITS-CLIP     | Mouse                                                                 | AGO2               | GSE89027  | GSM2357624 | P19              | CLIP_AGO2_LET7_1        |             |               |
|                                                        |               |                                                                       |                    |           | GSM2357625 |                  | CLIP_AGO2_LET7_2        |             |               |
|                                                        |               |                                                                       |                    |           | GSM2357626 |                  | CLIP_AGO2_LET7_3        |             |               |
|                                                        |               |                                                                       |                    |           | GSM2357627 |                  | CLIP_AGO2_siSFPQ_1      |             |               |
|                                                        |               |                                                                       |                    |           | GSM2357628 |                  | CLIP_AGO2_siSFPQ_2      |             |               |
|                                                        |               |                                                                       |                    |           | GSM2357629 |                  | CLIP_AGO2_siSFPQ_3      |             |               |
|                                                        |               |                                                                       |                    |           | GSM2357630 |                  | CLIP_AGO2_siSFPQ_LET7_1 |             |               |
|                                                        |               |                                                                       |                    |           | GSM2357631 |                  | CLIP_AGO2_siSFPQ_LET7_2 |             |               |
|                                                        |               |                                                                       |                    |           | GSM2357632 |                  | CLIP_AGO2_siSFPQ_LET7_3 |             |               |
|                                                        |               |                                                                       |                    |           | SFPQ       |                  | GSM2357633              | CLIP_SFPQ_1 |               |
|                                                        |               |                                                                       |                    |           |            |                  | GSM2357634              | CLIP_SFPQ_2 |               |
|                                                        |               |                                                                       |                    |           |            |                  | GSM2357635              | CLIP_SFPQ_3 |               |
|                                                        |               | GSM2357636                                                            | CLIP_SFPQ_siSFPQ_1 |           |            |                  |                         |             |               |
|                                                        |               | GSM2357637                                                            | CLIP_SFPQ_siSFPQ_2 |           |            |                  |                         |             |               |
|                                                        |               | GSM2357638                                                            | CLIP_SFPQ_siSFPQ_3 |           |            |                  |                         |             |               |
|                                                        |               | Rayon-Estrada, V.,<br>et al.<br>Proc Natl Acad Sci<br>USA 2017<br>(8) | HITS-CLIP          | Mouse     | AGO2       | GSE58798         | GSM1419779              | BMDM        | CLIP_BMDM_WT1 |
|                                                        |               |                                                                       |                    |           |            |                  | GSM1419780              |             | CLIP_BMDM_WT2 |
|                                                        |               |                                                                       |                    |           |            |                  | GSM1419781              |             | CLIP_BMDM_WT3 |
| GSM1419782                                             | CLIP_BMDM_KO1 |                                                                       |                    |           |            |                  |                         |             |               |
| GSM1419783                                             | CLIP_BMDM_KO2 |                                                                       |                    |           |            |                  |                         |             |               |
| GSM1419784                                             | CLIP_BMDM_KO3 |                                                                       |                    |           |            |                  |                         |             |               |
| Li, Y., et al.<br>J Mol Biol 2018<br>(9)               | HITS-CLIP     | Human                                                                 | AGO2               | GSE102319 | GSM2734703 | T-REx-293        | Ago2CLIP_gl3.1_rep1     |             |               |
|                                                        |               |                                                                       |                    |           | GSM2734704 |                  | Ago2CLIP_dsiHuR2_rep1   |             |               |
|                                                        |               |                                                                       |                    |           | GSM2734705 |                  | Ago2CLIP_dsiHuR5_rep1   |             |               |
|                                                        |               |                                                                       |                    |           | GSM2734706 |                  | Ago2CLIP_gl3.1_rep2     |             |               |
|                                                        |               |                                                                       |                    |           | GSM2734707 |                  | Ago2CLIP_dsiHuR2_rep2   |             |               |
|                                                        |               |                                                                       |                    |           | GSM2734708 |                  | Ago2CLIP_dsiHuR5_rep2   |             |               |

|                                                |           |       |            |                       |            |                 |                                                |                         |                               |
|------------------------------------------------|-----------|-------|------------|-----------------------|------------|-----------------|------------------------------------------------|-------------------------|-------------------------------|
|                                                |           |       |            |                       | GSM2734709 |                 | Ago2CLIP_gl3.1_rep3                            |                         |                               |
|                                                |           |       |            |                       | GSM2734710 |                 | Ago2CLIP_dsiHuR2_rep3                          |                         |                               |
|                                                |           |       |            |                       | GSM2734711 |                 | Ago2CLIP_dsiHuR5_rep3                          |                         |                               |
|                                                |           |       |            |                       | GSM2734712 |                 | Ago2CLIP_gl3.1_rep4                            |                         |                               |
|                                                |           |       |            |                       | GSM2734713 |                 | Ago2CLIP_dsiHuR2_rep4                          |                         |                               |
|                                                |           |       |            |                       | GSM2734714 |                 | Ago2CLIP_dsiHuR5_rep4                          |                         |                               |
|                                                |           |       |            |                       | GSM2734715 |                 | Ago2CLIP_gl3.1_rep5                            |                         |                               |
|                                                |           |       |            |                       | GSM2734716 |                 | Ago2CLIP_dsiHuR2_rep5                          |                         |                               |
|                                                |           |       | GSM2734717 | Ago2CLIP_dsiHuR5_rep5 |            |                 |                                                |                         |                               |
|                                                |           |       | HuR        | GSE102320             |            |                 |                                                | 293T and<br>293T NoDice | HuRCLIP_293T_rep1             |
|                                                |           |       |            |                       |            |                 |                                                |                         | HuRCLIP_293T_NoDice_2-20_rep1 |
|                                                |           |       |            |                       |            |                 |                                                |                         | HuRCLIP_293T_NoDice_4-25_rep1 |
|                                                |           |       |            |                       |            |                 |                                                |                         | HuRCLIP_293T_rep2             |
|                                                |           |       |            |                       |            |                 |                                                |                         | HuRCLIP_293T_NoDice_2-20_rep2 |
|                                                |           |       |            |                       |            |                 |                                                |                         | HuRCLIP_293T_NoDice_4-25_rep2 |
|                                                |           |       |            |                       |            |                 |                                                |                         | HuRCLIP_293T_rep3             |
|                                                |           |       |            |                       |            |                 |                                                |                         | HuRCLIP_293T_NoDice_2-20_rep3 |
| HuRCLIP_293T_NoDice_4-25_rep3                  |           |       |            |                       |            |                 |                                                |                         |                               |
| Pillman, K.A., et al.<br>EMBO J 2018<br>(10)   | HITS-CLIP | Human | QKI        | GSE111188             |            | HMLE            | QKI_techrep1_mon                               |                         |                               |
|                                                |           |       |            |                       |            |                 | QKI_techrep1_dim                               |                         |                               |
|                                                |           |       |            |                       |            |                 | QKI_techrep2_mon                               |                         |                               |
|                                                |           |       |            |                       |            |                 | QKI_techrep2_dim                               |                         |                               |
|                                                |           |       |            |                       |            |                 | QKI_techrep2_dim_SSIV                          |                         |                               |
|                                                |           |       |            |                       |            |                 | QKI_techrep3_mon                               |                         |                               |
|                                                |           |       |            |                       |            |                 | QKI_techrep3_dim                               |                         |                               |
|                                                |           |       |            |                       |            |                 | SizeMatchedInput_techrep1                      |                         |                               |
|                                                |           |       |            |                       |            |                 | SizeMatchedInput_techrep2                      |                         |                               |
|                                                |           |       |            |                       |            |                 | Sarshad, A.A., et al.<br>Mol Cell 2018<br>(11) | PAR-CLIP                | Mouse                         |
| ESC_Nucl                                       |           |       |            |                       |            |                 |                                                |                         |                               |
| MT_Cyto                                        |           |       |            |                       |            |                 |                                                |                         |                               |
| MT_Nucl                                        |           |       |            |                       |            |                 |                                                |                         |                               |
| Moro, A., et al.<br>Nat Cell Biol 2019<br>(12) | HITS-CLIP | Human | AGO2       | GSE99686              |            | HUVEC and HUAEC | Arteries_E1                                    |                         |                               |
|                                                |           |       |            |                       |            |                 | Arteries_E3                                    |                         |                               |
|                                                |           |       |            |                       |            |                 | Arteries_L1                                    |                         |                               |
|                                                |           |       |            |                       |            |                 | Veins_E2                                       |                         |                               |
|                                                |           |       |            |                       |            |                 | Veins_E3                                       |                         |                               |
|                                                |           |       |            |                       |            |                 | Veins_L2                                       |                         |                               |

|                                      |                  |       |     |           |                                               |             |           |
|--------------------------------------|------------------|-------|-----|-----------|-----------------------------------------------|-------------|-----------|
| Xu, P., et al.<br>Blood 2019<br>(13) | HITS-CLIP        | Mouse | AGO | GSE104357 | GSM2796019                                    | Fetal Liver | 1WT       |
|                                      |                  |       |     |           | GSM2796020                                    |             | 9WT       |
|                                      |                  |       |     |           | GSM2796021                                    |             | 10WT      |
|                                      |                  |       |     |           | GSM2796022                                    |             | 3KO       |
|                                      |                  |       |     |           | GSM2796023                                    |             | 12KO      |
|                                      |                  |       |     |           | GSM2796024                                    |             | 13KO      |
|                                      |                  |       |     |           | GSM2796025                                    |             | 2WT-IgG   |
|                                      |                  |       |     |           | GSM2796026                                    |             | 6WT-IgG   |
|                                      |                  |       |     |           | GSM2796027                                    |             | 11WT-IgG  |
|                                      |                  |       |     |           | GSM2796028                                    |             | 4KO-IgG   |
|                                      |                  |       |     |           | GSM2796029                                    |             | 8KO-IgG   |
|                                      |                  |       |     |           | GSM2796030                                    |             | 14KO-IgG  |
|                                      |                  |       |     |           | Gagnon, J.D., et al.<br>Cell Rep 2019<br>(14) |             | HITS-CLIP |
| GSM3746478                           | Th2_miR29WT_1.1  |       |     |           |                                               |             |           |
| GSM3746479                           | Th2_miR29KO_2.1  |       |     |           |                                               |             |           |
| GSM3746480                           | Th2_miR29KO_2.2  |       |     |           |                                               |             |           |
| GSM3746481                           | Th2_miR29KO_2.3  |       |     |           |                                               |             |           |
| GSM3746482                           | Th2_miR29WT_2.1  |       |     |           |                                               |             |           |
| GSM3746483                           | Th2_miR29WT_2.2  |       |     |           |                                               |             |           |
| GSM3746484                           | Th2_miR29WT_2.3  |       |     |           |                                               |             |           |
| GSM3746485                           | Th2_miR29WT_3.1  |       |     |           |                                               |             |           |
| GSM3746486                           | Th2_miR29KO_4.1  |       |     |           |                                               |             |           |
| GSM3746487                           | Th2_miR29KO_4.2  |       |     |           |                                               |             |           |
| GSM3746488                           | Th2_miR29KO_4.3  |       |     |           |                                               |             |           |
| GSM3746489                           | Th2_miR29WT_4.1  |       |     |           |                                               |             |           |
| GSM3746490                           | Th2_miR29WT_4.2  |       |     |           |                                               |             |           |
| GSM3746491                           | Th2_miR29WT_4.3  |       |     |           |                                               |             |           |
| GSM3746492                           | Th2_B6_2hrStim   |       |     |           |                                               |             |           |
| GSM3746493                           | Th2_B6_6hrStim   |       |     |           |                                               |             |           |
| GSM3746494                           | Th2_B6_NoRestim  |       |     |           |                                               |             |           |
| GSM3746495                           | Th17_miR29KO_1.1 |       |     |           |                                               |             |           |
| GSM3746496                           | Th17_miR29WT_1.1 |       |     |           |                                               |             |           |

## REFERENCES

1. Park, H.J., Ji, P., Kim, S., Xia, Z., Rodriguez, B., Li, L., Su, J., Chen, K., Masamha, C.P., Baillat, D. *et al.* (2018) 3' UTR shortening represses tumor-suppressor genes in trans by disrupting ceRNA crosstalk. *Nat Genet*, **50**, 783-789.
2. Dietrich, P., Koch, A., Fritz, V., Hartmann, A., Bosserhoff, A.K. and Hellerbrand, C. (2018) Wild type Kirsten rat sarcoma is a novel microRNA-622-regulated therapeutic target for hepatocellular carcinoma and contributes to sorafenib resistance. *Gut*, **67**, 1328-1341.
3. Radovich, M., Pickering, C.R., Felau, I., Ha, G., Zhang, H., Jo, H., Hoadley, K.A., Anur, P., Zhang, J., McLellan, M. *et al.* (2018) The Integrated Genomic Landscape of Thymic Epithelial Tumors. *Cancer Cell*, **33**, 244-258 e210.
4. Zhu, Y., Sousa, A.M.M., Gao, T., Skarica, M., Li, M., Santpere, G., Esteller-Cucala, P., Juan, D., Ferrandez-Peral, L., Gulden, F.O. *et al.* (2018) Spatiotemporal transcriptomic divergence across human and macaque brain development. *Science*, **362**.
5. Eyileten, C., Wicik, Z., De Rosa, S., Mirowska-Guzel, D., Soplinska, A., Indolfi, C., Jastrzebska-Kurkowska, I., Czlonkowska, A. and Postula, M. (2018) MicroRNAs as Diagnostic and Prognostic Biomarkers in Ischemic Stroke- A Comprehensive Review and Bioinformatic Analysis. *Cells*, **7**.
6. Benway, C.J. and Iacomini, J. (2018) Defining a microRNA-mRNA interaction map for calcineurin inhibitor induced nephrotoxicity. *Am J Transplant*, **18**, 796-809.
7. Bottini, S., Hamouda-Tekaya, N., Mategot, R., Zaragosi, L.E., Audebert, S., Pisano, S., Grandjean, V., Mauduit, C., Benahmed, M., Barbry, P. *et al.* (2017) Post-transcriptional gene silencing mediated by microRNAs is controlled by nucleoplasmic Sfpq. *Nat Commun*, **8**, 1189.
8. Rayon-Estrada, V., Harjanto, D., Hamilton, C.E., Berchiche, Y.A., Gantman, E.C., Sakmar, T.P., Bulloch, K., Gagnidze, K., Harroch, S., McEwen, B.S. *et al.* (2017) Epitranscriptomic profiling across cell types reveals associations between APOBEC1-mediated RNA editing, gene expression outcomes, and cellular function. *Proc Natl Acad Sci U S A*, **114**, 13296-13301.
9. Li, Y., Estep, J.A. and Karginov, F.V. (2018) Transcriptome-wide Identification and Validation of Interactions between the miRNA Machinery and HuR on mRNA Targets. *J Mol Biol*, **430**, 285-296.
10. Pillman, K.A., Phillips, C.A., Roslan, S., Toubia, J., Dredge, B.K., Bert, A.G., Lumb, R., Neumann, D.P., Li, X., Conn, S.J. *et al.* (2018) miR-200/375 control epithelial plasticity-associated alternative splicing by repressing the RNA-binding protein Quaking. *EMBO J*, **37**.
11. Sarshad, A.A., Juan, A.H., Muler, A.I.C., Anastasakis, D.G., Wang, X., Genzor, P., Feng, X., Tsai, P.F., Sun, H.W., Haase, A.D. *et al.* (2018) Argonaute-miRNA Complexes Silence Target mRNAs in the Nucleus of Mammalian Stem Cells. *Mol Cell*, **71**, 1040-1050 e1048.
12. Moro, A., Driscoll, T.P., Boraas, L.C., Armero, W., Kasper, D.M., Baeyens, N., Jouy, C., Mallikarjun, V., Swift, J., Ahn, S.J. *et al.* (2019) MicroRNA-dependent regulation of biomechanical genes establishes tissue stiffness homeostasis. *Nat Cell Biol*, **21**, 348-358.
13. Xu, P., Palmer, L.E., Lechauve, C., Zhao, G., Yao, Y., Luan, J., Vourekas, A., Tan, H., Peng, J., Schuetz, J.D. *et al.* (2019) Regulation of gene expression by miR-144/451 during mouse erythropoiesis. *Blood*, **133**, 2518-2528.
14. Gagnon, J.D., Kageyama, R., Shehata, H.M., Fassett, M.S., Mar, D.J., Wigton, E.J., Johansson, K., Litterman, A.J., Odorizzi, P., Simeonov, D. *et al.* (2019) miR-15/16 Restrain Memory T Cell Differentiation, Cell Cycle, and Survival. *Cell Rep*, **28**, 2169-2181 e2164.
